# Supplementary material
Source: Springer Nature journal article supplement (https://www.springermedizin.de/resource/supplementary/13014_2013_905_MOESM1_ESM.pdf/9634402)

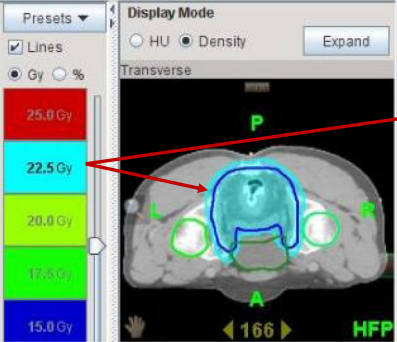

(A)

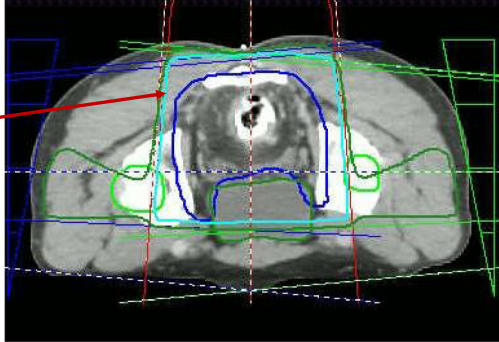

(B)

Supplement: MOESM1 [file 9634402]
